# Supplementary material for: Enhanced hydrogenation of ethyl levulinate by Pd–AC doped with Nb2O5
Source: Royal Society of Chemistry journal article supplement (doi:10.1039/c4gc00972j), 2014-06-18
Supplement: c4gc00972j1.pdf [file c4gc00972j1.pdf]

## Supporting Information to

# Enhanced hydrogenation of ethyl levulinate to $\gamma$ -valerolactone and ethyl pentanoate by Pd/AC doped with Nb<sub>2</sub>O<sub>5</sub>

Feiyang Ye, Damin Zhang, Teng Xue, Yimeng Wang, Yejun Guan\*

Shanghai Key Laboratory of Green Chemistry and Chemical Processes, East China  
Normal University, North Zhongshan Road 3663, 200062 Shanghai, China.

Corresponding author: Yejun Guan, Fax: (0086)21-32530334, E-mail: [yjguan@chem.ecnu.edu.cn](mailto:yjguan@chem.ecnu.edu.cn)

Figure S1. Nitrogen adsorption isotherms of xNb-500-AC catalysts with different loading of niobium oxide: (a) 0 wt. %; (b) 2.5 wt. %; (c) 5 wt. %; (d) 10 wt. %; (e) 20 wt. %.

Figure S2. Nitrogen adsorption isotherms of 10Nb-y-AC catalysts with different calcination temperature of niobium oxide: (a) 300 °C; (b) 500 °C; (c) 700 °C.

Figure S3. SEM image of 10Nb-500-AC. Results of EDX measurement are given in Table S1.

Figure S4. XRD patterns of 3Pd-Nb<sub>2</sub>O<sub>5</sub> catalysts.

Table S1. EDX measurements (in weight %) of 10Nb-500-AC.

Table S2. Hydrogenation activities of Pd-AC and 3Pd-10Nb-500-AC for EL and LA.

Table S3. Hydrogenation of EL by Pd-Nb<sub>2</sub>O<sub>5</sub> catalysts.

Table S4. Activities of AC and 10Nb-y-AC supports in EL hydrolysis and EHP dealcoholization.

## 1. Characterization

### 1.1 BET

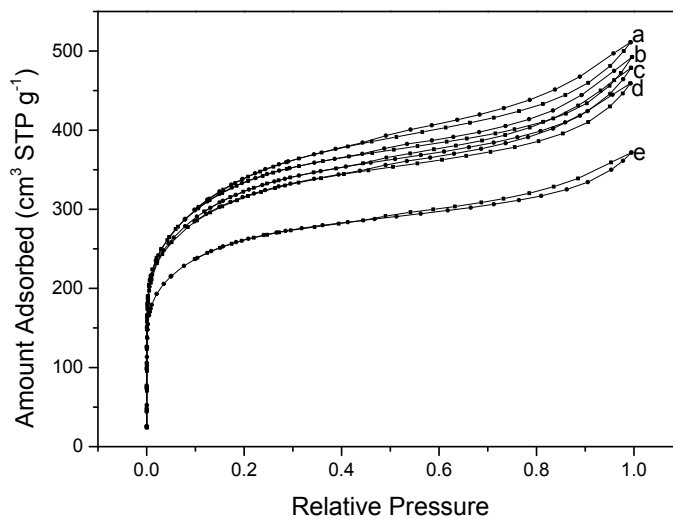

**Figure S1.** Nitrogen adsorption isotherms of xNb-500-AC catalysts with different loading of niobium oxide: (a) 0 wt. %; (b) 2.5 wt. %; (c) 5 wt. %; (d) 10 wt. %; (e) 20 wt. %.

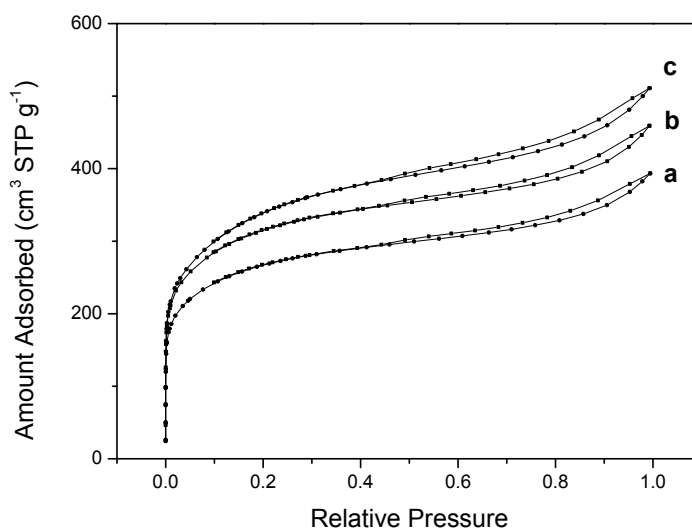

**Figure S2.** Nitrogen adsorption isotherms of 10Nb- $\gamma$ -AC catalysts with different calcination temperature of niobium oxide: (a) 300 °C; (b) 500 °C; (c) 700 °C.

## 1.2 EDX

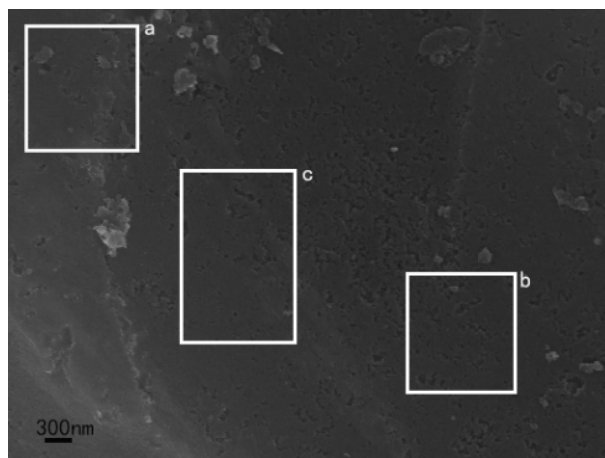

Figure S3. SEM image of 10Nb-500-AC. Results of EDX measurement are given in Table S1.

Table S1. EDX measurements (in weight %) of 10Nb-500-AC.

| EDX point | 10Nb-500-AC |     |      |     |     |
|-----------|-------------|-----|------|-----|-----|
|           | Nb          | O   | C    | Al  | Si  |
| a         | 5.0         | 6.0 | 88.6 | 0.1 | 0.2 |
| b         | 4.8         | 5.9 | 89.1 | 0.1 | 0.0 |
| c         | 5.0         | 5.7 | 88.9 | 0.1 | 0.3 |

## 1.3 XRD

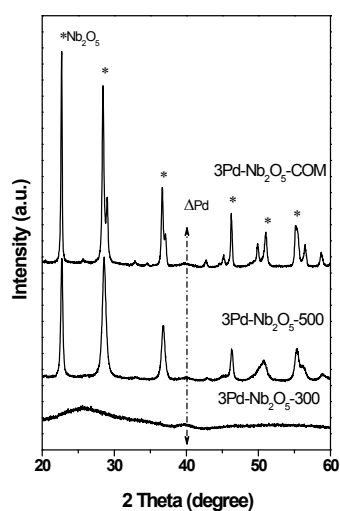

Figure S4. XRD patterns of 3Pd-Nb<sub>2</sub>O<sub>5</sub> catalysts.

## 2 Catalytic Tests

**Table S2.** Hydrogenation activities of Pd-AC and 3Pd-10Nb-500-AC for EL and LA.

| Catalyst        | Substrate       | Conv. EL/LA (%) | Sel. (%) |     |     |
|-----------------|-----------------|-----------------|----------|-----|-----|
|                 |                 |                 | LA       | GVL | EHP |
| 3Pd-AC          | EL <sup>a</sup> | 38              | 3        | 74  | 23  |
|                 | LA <sup>b</sup> | 20              | -        | 100 | -   |
| 3Pd-10Nb-500-AC | EL <sup>a</sup> | 87              | 2        | 93  | 5   |
|                 | LA <sup>b</sup> | 62              | -        | 100 | -   |

<sup>a</sup> Reaction conditions: 10 ml of 0.25 M EL aqueous solution; 0.5 MPa H<sub>2</sub>; 100 °C; 25 mg catalyst (3 wt.% Pd); 5 h; 800 rpm.

<sup>b</sup> Reaction conditions: 10 ml of 0.25 M LA aqueous solution; 0.5 MPa H<sub>2</sub>; 100 °C; 25 mg catalyst (3 wt.% Pd); 5 h; 800 rpm.

**Table S3.** Hydrogenation of EL by Pd-Nb<sub>2</sub>O<sub>5</sub> catalysts.

| Catalysts <sup>a</sup>                 | Conv. EL |
|----------------------------------------|----------|
| Pd-Nb <sub>2</sub> O <sub>5</sub> -COM | 2        |
| Pd-Nb <sub>2</sub> O <sub>5</sub> -300 | 2        |
| Pd-Nb <sub>2</sub> O <sub>5</sub> -500 | 1        |

<sup>a</sup> Reaction conditions: 10 ml of 0.25 M EL aqueous solution; 0.5 MPa H<sub>2</sub>; 100 °C; 25 mg catalyst (3 wt.% Pd); 5 h; 800 rpm.

**Table S4.** Activities of AC and 10Nb-y-AC supports in EL hydrolysis and EHP dealcoholization.

| Substrate        | Catalyst    | Conv. (%) |
|------------------|-------------|-----------|
| EL <sup>a</sup>  | AC          | 1         |
|                  | 10Nb-300-AC | 3         |
|                  | 10Nb-500-AC | 5         |
|                  | 10Nb-700-AC | 1         |
|                  | AC          | 51        |
| EHP <sup>b</sup> | 10Nb-300-AC | 86        |
|                  | 10Nb-500-AC | 90        |
|                  | 10Nb-700-AC | 56        |

<sup>a</sup> Hydrolysis of EL. Reaction conditions: 10 ml of 0.25 M EL aqueous solution; 0.5 MPa N<sub>2</sub>; 100 °C; 25 mg catalyst; 5 h.

<sup>b</sup> Dealcoholization of EHP. Reaction conditions: 10 ml of 0.25 M EHP aqueous solution; 0.5 MPa N<sub>2</sub>; 100 °C; 25 mg catalyst; 5 h.
